# Supplementary material for: Constructing a TiO2/PDA core/shell nanorod array electrode as a highly sensitive and stable photoelectrochemical glucose biosensor
Source: Royal Society of Chemistry journal article supplement (doi:10.1039/c9ra10445c), 2020-01-01
Supplement: c9ra10445c1.pdf [file c9ra10445c1.pdf]

## Supporting Information

# Constructing TiO<sub>2</sub>/PDA core/shell nanorod array electrode as a highly sensitive and stable photoelectrochemical glucose biosensor

*Wei Xu<sup>a</sup>, Wenke Yang<sup>a</sup>, Hongkai Guo<sup>a</sup>, Lianyuan Ge<sup>a</sup>, Jinchun Tu<sup>a,\*</sup> and Chao Zhen<sup>b,\*</sup>*

<sup>a</sup> State Key Laboratory of Marine Resource Utilization in South China Sea, College of Materials and Chemical Engineering, Hainan University, Haikou 570228, PR China

<sup>b</sup> Shenyang National Laboratory for Materials Science, Institute of Metal Research, Chinese Academy of Sciences, 72# Wenhua RD, Shenyang 110016, China.

---

\* Corresponding author: [tujinchun@hainu.edu.cn](mailto:tujinchun@hainu.edu.cn)(Jinchun Tu)

\* Corresponding author: [czen@imr.ac.cn](mailto:czen@imr.ac.cn)(Chao Zhen)

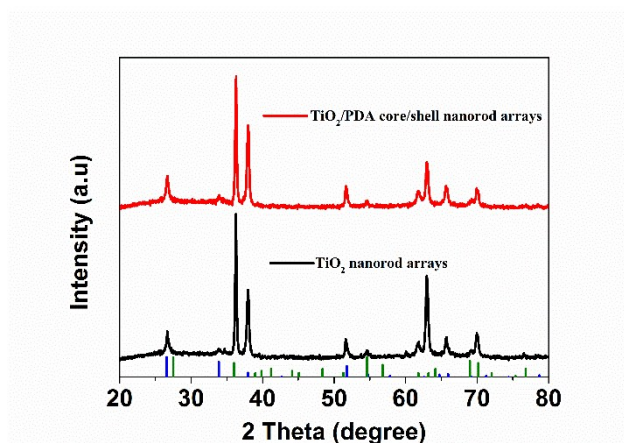

**Fig S1.** XRD patterns of the  $\text{TiO}_2$  nanorod arrays (black one) and  $\text{TiO}_2/\text{PDA}$  core/shell nanorod arrays (red one) on the FTO substrate. (The vertical line of green and blue are the peaks corresponding to the PDF card of R- $\text{TiO}_2$ ,  $\text{SnO}_2$ , respectively. Meanwhile, the interpretation of the references to color in this figure legend, the reader is referred to the web version of this article.).

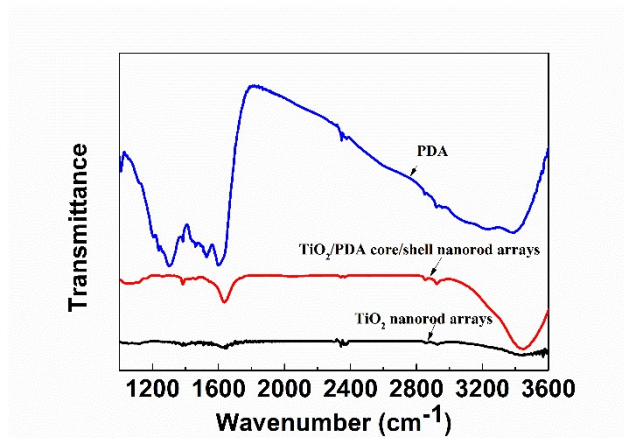

**Fig S2.** FTIR spectra of  $\text{TiO}_2$  nanorod arrays, PDA and  $\text{TiO}_2/\text{PDA}$  core/shell nanorod arrays.

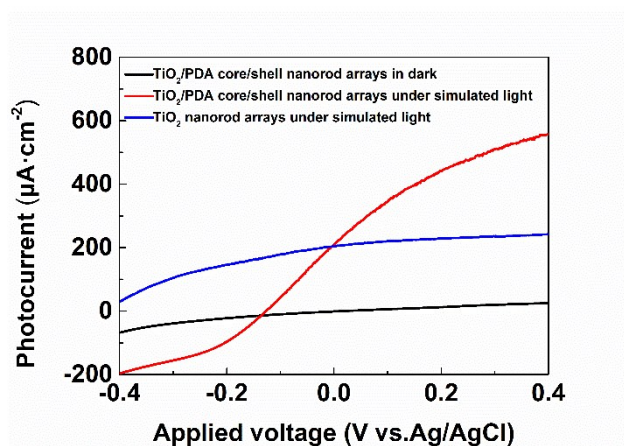

Fig S3. J-V curves of TiO<sub>2</sub> nanorod arrays under simulated light, TiO<sub>2</sub>/PDA core/shell nanorod arrays in the dark and under simulated light.

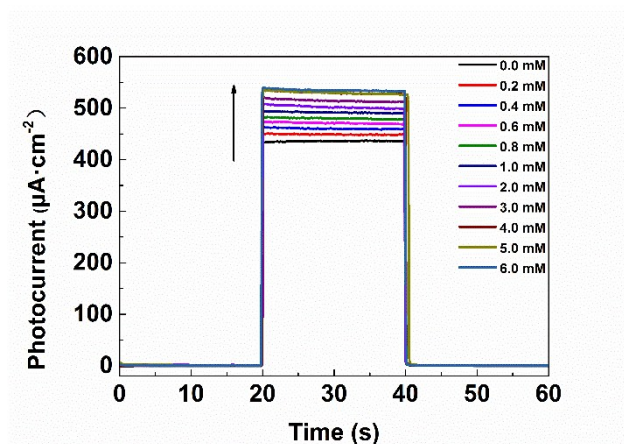

Fig S4. Chronoamperometric i-t response of glucose oxidase modified TiO<sub>2</sub>/PDA electrode to glucose with different concentrations in phosphate buffer at 0.4V.

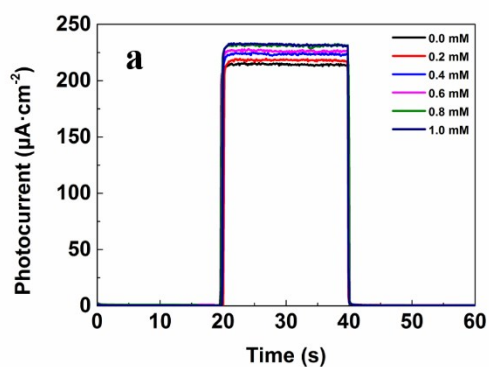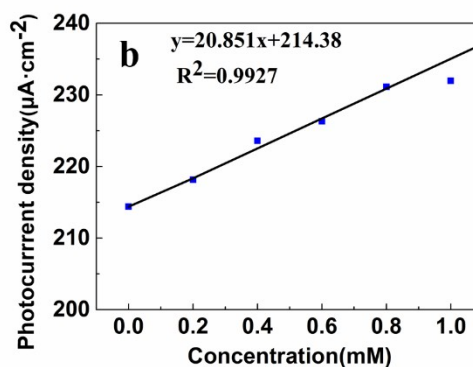

**Fig S5.** (a) Chronoamperometric  $i-t$  response of the glucose oxidase modified  $\text{TiO}_2$  electrode to glucose with different concentrations in phosphate buffer at 0.4V; (b) The calibration curve between glucose concentration vs photocurrent density.

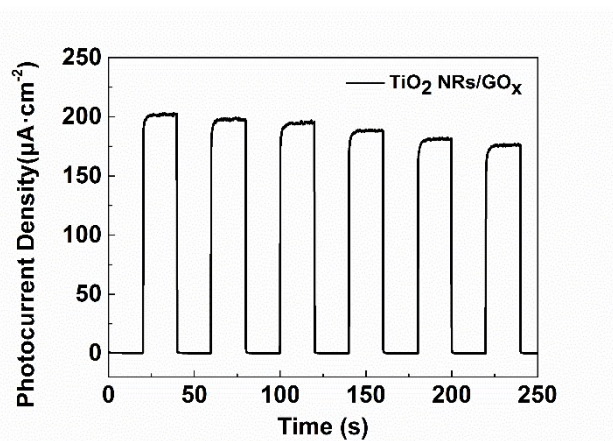

**Fig S6.** Stability test of the glucose oxidase modified  $\text{TiO}_2/\text{PDA}$  electrode at the concentration of 1 mM glucose.
